# Supplementary material for: Nitrogen-doped hollow carbon hemispheres as efficient metal-free electrocatalysts for oxygen reduction reaction in alkaline medium
Source: Royal Society of Chemistry journal article supplement (doi:10.1039/c3ta13757k), 2013-11-07
Supplement: c3ta13757k.pdf [file c3ta13757k.pdf]

## Supporting Information

### **Nitrogen-Doped Hollow Carbon Hemispheres as Efficient Metal-Free Electrocatalysts for Oxygen Reduction Reaction**

*Chuanlong Han, Jing Wang, Yutong Gong, Xuan Xu, Haoran Li and Yong Wang\**

#### Index

#### Experimental Section

Scheme S1. The structure of 3-MBP-dca and CMIM-Cl

Table S1. Elemental analysis results of ionic liquid CMIM-Cl

Table S2. Elemental analysis results of HCH-dca-900 ( $r=0.5$ ,  $1.0$  and  $2.0$ )

Table S3. The peak potential and current density of HCH

Table S4. ICP analysis of silicon content

Table S5. Compare HCH with the other N-doped carbons for ORR

Table S6. The FWHM of N1s XPS peaks

Figure S1.  $^1\text{H}$ NMR of ionic liquid CMIM-Cl

Figure S2. FT-IR spectrum of ionic liquid CMIM-Cl

Figure S3. SEM images of spherical silica template

Figure S4. SEM images of HCH-dca-900 ( $r=1.0$ )

Figure S5. SEM images of HCH-dca-900 ( $r=2.0$ )

Figure S6. SEM images of HCH-dca-600 ( $r=1.0$ )

Figure S7. SEM images of HCH-dca-1000 ( $r=1.0$ )

Figure S8. SEM images of HCH-Cl-900

Figure S9. XPS spectra of HCH-dca-900 ( $r=1.0$ )

Figure S10. Raman spectra of HCH-dca-900 with different  $r$ .

Figure S11. Nitrogen adsorption / desorption isotherms of HCH-dca-900

Figure S12. The cyclic voltammograms of HCH-dca-900

Figure S13. The electrocatalytic properties of HCH-Cl-900

Figure S14. LSV curves of ORR of blank experiment on the GC electrode

Equation S1. The equation of the shifted electrons  $n$  of ORR in alkaline electrolyte

Equation S2. The Koutecky-Levich equations.

## Experimental Section

**Materials:** Silver nitrate (AR, >99%), bromobutane (CP, >98%), ammonium hydroxide (NH<sub>4</sub>OH, 25-28 wt%), ethanol (AR) were used as received from Sinopharm Chemical Reagent Co., Ltd. tetraethyl orthosilicate (TEOS, AR), Na(CN)<sub>2</sub> (>96%), 3-picoline (99%), 1-methylimidazole (99%), 4-chlorobutyronitrile (98%), NH<sub>4</sub>HF<sub>2</sub> (AR, >98.5%) were used as received from Aladdin Chemistry Co., Ltd. Nafion 117 solution (5 wt%) was obtained from Aldrich Chemistry Co., Ltd. 20 wt% Pt/C was used as received from Alfa aesar Chemistry Co., Ltd. All the chemicals were used as delivered without further treatment.

**Synthesis of 3-MBP-dca:** 3-MBP-dca was prepared according to our previous literature.<sup>1</sup>

**Synthesis of CMIM-Cl:** 0.2 mol (16.4g) 1-methylimidazole was added into a 250 ml three-neck flask, the equal stoichiometric 4-chlorobutyronitrile (0.2 mol, 20.7 g) in a constant pressure funnel was dropped into the three-neck flask within two hours with a high speed magnetic stirring of 1000 rpm at 100 °C. After another 20 hours reaction, this reaction was stopped and ionic liquid CMIM-Cl was obtained.

**Synthesis of Silica Spheres Template:** Firstly, 3.14 ml of ammonia hydroxide was added into a solution containing 74 ml of ethanol and 10 ml of deionized water, and then the mixed solution was stirred at 303 K for 0.5 h. Secondly, 6 ml of TEOS was added into the above-prepared mixture quickly under vigorous stirring and the reaction mixture was kept stirring for 1 h to yield uniform silica spheres (Stöber silica sol). Thirdly, the nanostructured silica was centrifuged, dried at 70 °C overnight to obtain white solid powder.

**Synthesis of HCH Materials:** The HCH was synthesized using ILs as the precursors and silica sphere as the hard template. Typically, taking the synthesis of HCH-dca-900 (r=1.0) as an example: Firstly, 1.0 g silica spheres was placed into a crucible, then 3.0 g deionized water and 1.0 g 3-MBP-dca were added into. They were mixed together by magnetic stirring for 24 h and then dried at 70 °C in an oven for another 24 h. Secondly, the mixture was calcined in a Muffle furnace at programmed temperature in N<sub>2</sub> flow (400 mL/min). The temperature program was shown as follow: the temperature rose from room temperature to 300 °C in 30 minutes, then it remained at 300 °C for 1 hour; After that, the temperature rose to 900 °C within 1 hour and remained for another 1 hour; Later, it began to cool down naturally. Thirdly, after it cooled down to room temperature, loose black solid with pore was gained. Then the black solid was ground into black powder and transferred into a plastic bottle, 40 g NH<sub>4</sub>HF<sub>2</sub> and 160 g deionized water were also added into the bottle. Furthly, the mixtures were stirred for 48 hours at room temperature. At last, filter the solution and the black solid residue was dried at 70 °C in an oven overnight.

**Characterization:** SEM images were obtained on a Zeiss Ultra 55 microscope. TEM studies were performed on a Hitachi HT-7700 microscope. The X-ray photoelectron spectra (XPS) was obtained by an ESCALAB MARK II spherical analyzer using an aluminum-magnesium binode (Al 1486.6 eV, Mg 1253.6 eV) X-ray source. The Raman spectra was collected on a Raman spectrometer (JY, HR 800) using 514-nm

laser. The  $^1\text{H}$ NMR spectrum was collected on a BRUKER Advance 2B, 400 MHz. The FT-IR spectrum was collected on a Nicolet Nexus 470. The element analysis was carried out on the Flash EA 1112, ThermoFinnigan. The BET surfaces were determined by Tristar II 3020, BET equation was used to calculate the surface areas and pore volume and samples were degassed at 150 °C for 6 h until the residual pressure was less than  $10^{-4}$  Pa. The ICP analysis was carried out on a PerkinElmer Optima OES 8000.

**Electrochemical characterization:** Electrochemical measurements were performed using a computer-controlled workstation (LK2005A, China) with a typical three-electrode cell. Rotating disk electrode (RDE) was used as working electrode, a platinum sheet as counter electrode and saturated calomel electrode (SCE) as reference electrode. The activity of the HCH materials was evaluated by the CV and LSV techniques. Fabrication of the working electrode was done by pasting catalyst inks on a glassy carbon electrode (5 mm in diameter, from Pine). The carbon ink was formed by mixing 10 mg of HCH catalyst, 50  $\mu\text{L}$  5 wt% Nafion solution and 500  $\mu\text{L}$  ethanol in a plastic vial under ultra-sonication for 20 min. A 5  $\mu\text{L}$  aliquot of the carbon ink was dropped on the surface of the glassy carbon electrode, yielding an approximate catalyst loading of 0.09 mg. For comparison, the commercial 20 wt% Pt/C catalyst was dealt with in the same method. All the experiments were conducted at room temperature.

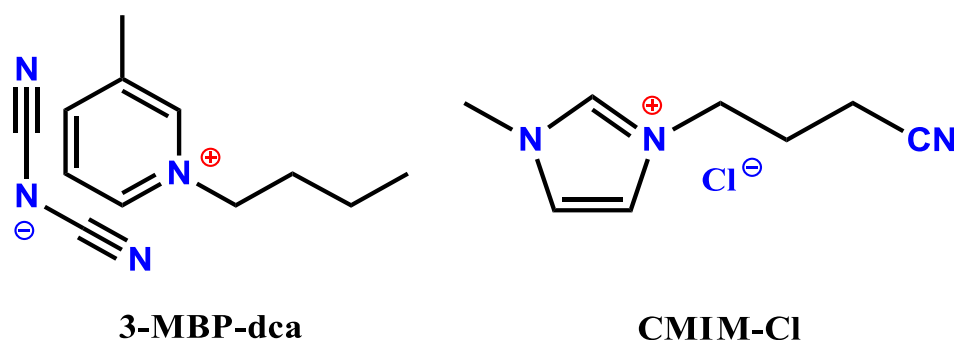

**Scheme S1.** The structure of 3-MBP-dca and CMIM-Cl.

**Table S1.** Elemental analysis results of ionic liquid CMIM-Cl.

| Entry | Catalyst | C (wt%) | N (wt%) | H (wt%) | Cl (wt%, calculated) |
|-------|----------|---------|---------|---------|----------------------|
| 1     | CMIM-Cl  | 52.0    | 22.3    | 6.5     | 19.2                 |

**Table S2.** Elemental analysis results of HCH-dca-900 (r=0.5, 1.0 and 2.0).

| Entry | Catalyst            | N (wt%) | C (wt%) | H (wt%) | O ( wt%,<br>calculated) |
|-------|---------------------|---------|---------|---------|-------------------------|
| 1     | HCH-dca-900 (r=0.5) | 8.0     | 61.4    | 1.1     | 29.5                    |
| 2     | HCH-dca-900 (r=1.0) | 10.9    | 76.7    | 1.3     | 11.1                    |
| 3     | HCH-dca-900 (r=2.0) | 9.6     | 78.0    | 3.1     | 9.3                     |

**Table S3.** The peak potential and current density of HCH.

| Entry | Catalyst            | Peak potential (V) [a] | Current density<br>(mA/cm <sup>2</sup> ) [a] |
|-------|---------------------|------------------------|----------------------------------------------|
| 1     | HCH-dca-900(r=0.5)  | -0.345                 | -3.4                                         |
| 2     | HCH-dca-900(r=1.0)  | -0.345                 | -4.2                                         |
| 3     | HCH-dca-900(r=2.0)  | -0.326                 | -2.8                                         |
| 4     | HCH-dca-600(r=1.0)  | -0.409                 | -2.5                                         |
| 5     | HCH-dca-1000(r=1.0) | -0.318                 | -2.6                                         |
| 6     | HCH-Cl-900(r=0.5)   | -0.300                 | -1.4                                         |
| 7     | HCH-Cl-900(r=1.0)   | -0.309                 | -4.1                                         |
| 8     | HCH-Cl-900(r=2.0)   | -0.349                 | -4.8                                         |

[a] in O<sub>2</sub>-saturated 0.1 M KOH at a scan rate of 50 mV s<sup>-1</sup> from CV curves.

**Table S4.** ICP analysis of silicon content.

| Entry | Catalyst            | Si / % |
|-------|---------------------|--------|
| 1     | HCH-dca-900 (r=0.5) | 0.05   |
| 2     | HCH-dca-900 (r=1.0) | 0.09   |
| 3     | HCH-dca-900 (r=2.0) | 0.08   |

**Table S5.** compare HCH with the other N-doped carbons for ORR

| Entry | Catalyst            | ORR activity vs.<br>Pt/C | Fuel<br>tolerance  | 4e <sup>-</sup><br>Reduction | Refs.         |
|-------|---------------------|--------------------------|--------------------|------------------------------|---------------|
| 1     | HCH                 | Comparable               | CH <sub>3</sub> OH | √                            | This<br>paper |
| 2     | N-CNT               | Comparable               | CH <sub>3</sub> OH | ×                            | [2]           |
| 3     | N-CNT fibre         | Better                   |                    | √                            | [3]           |
| 4     | N-CNC               | Better                   | CH <sub>3</sub> OH | √                            | [4]           |
| 5     | N-mesoporous carbon | Comparable               | CH <sub>3</sub> OH | √                            | [5]           |
| 6     | N-graphitic array   | Better                   | CH <sub>3</sub> OH | √                            | [6]           |

**Table S6.** The FWHM of N1s XPS peaks.

| FWHM                 | 401.4 eV    | 400.2 eV   | 398.6 eV    |
|----------------------|-------------|------------|-------------|
|                      | Graphitic N | Pyrrolic N | Pyridinic N |
| HCH-dca-900 (r=0.5)  | 1.80        | 1.87       | 1.29        |
| HCH-dca-900 (r=1.0)  | 1.73        | 1.70       | 1.36        |
| HCH-dca-900 (r=2.0)  | 1.79        | 1.66       | 1.29        |
| HCH-dca-600 (r=1.0)  | 1.28        | 2.02       | 1.20        |
| HCH-dca-1000 (r=1.0) | 2.19        | 2.01       | 1.25        |

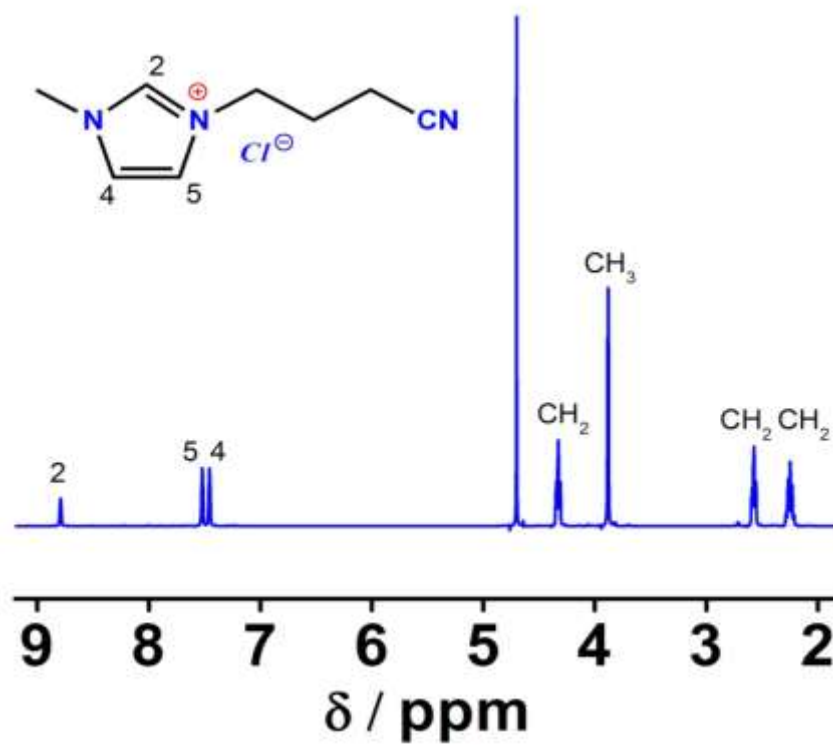

**Figure S1.**  $^1\text{H}$ NMR of ionic liquid CMIM-Cl.

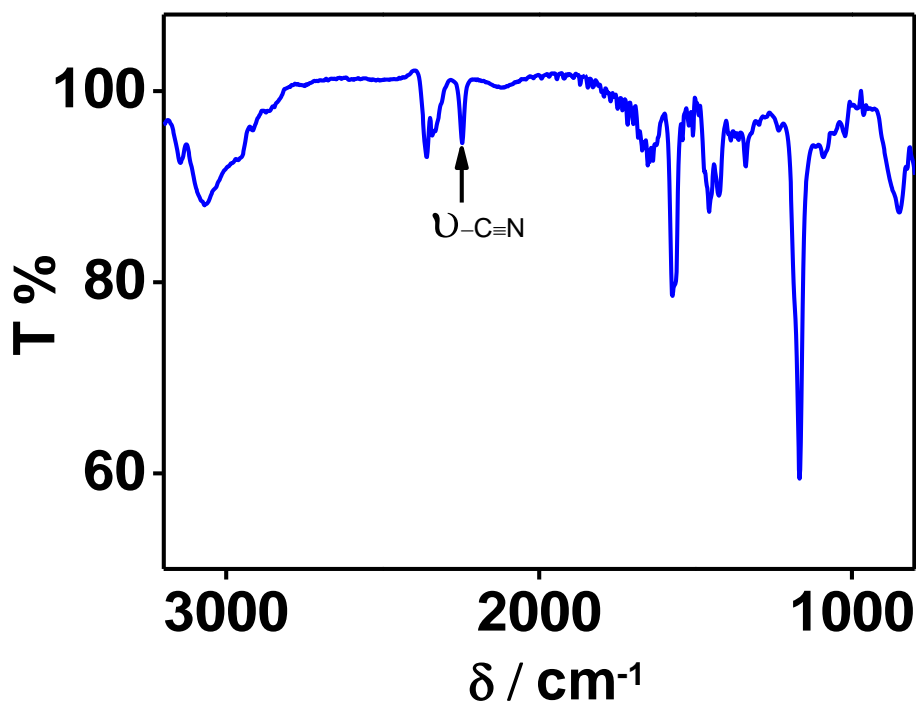

**Figure S2.** FT-IR spectrum of ionic liquid CMIM-Cl.

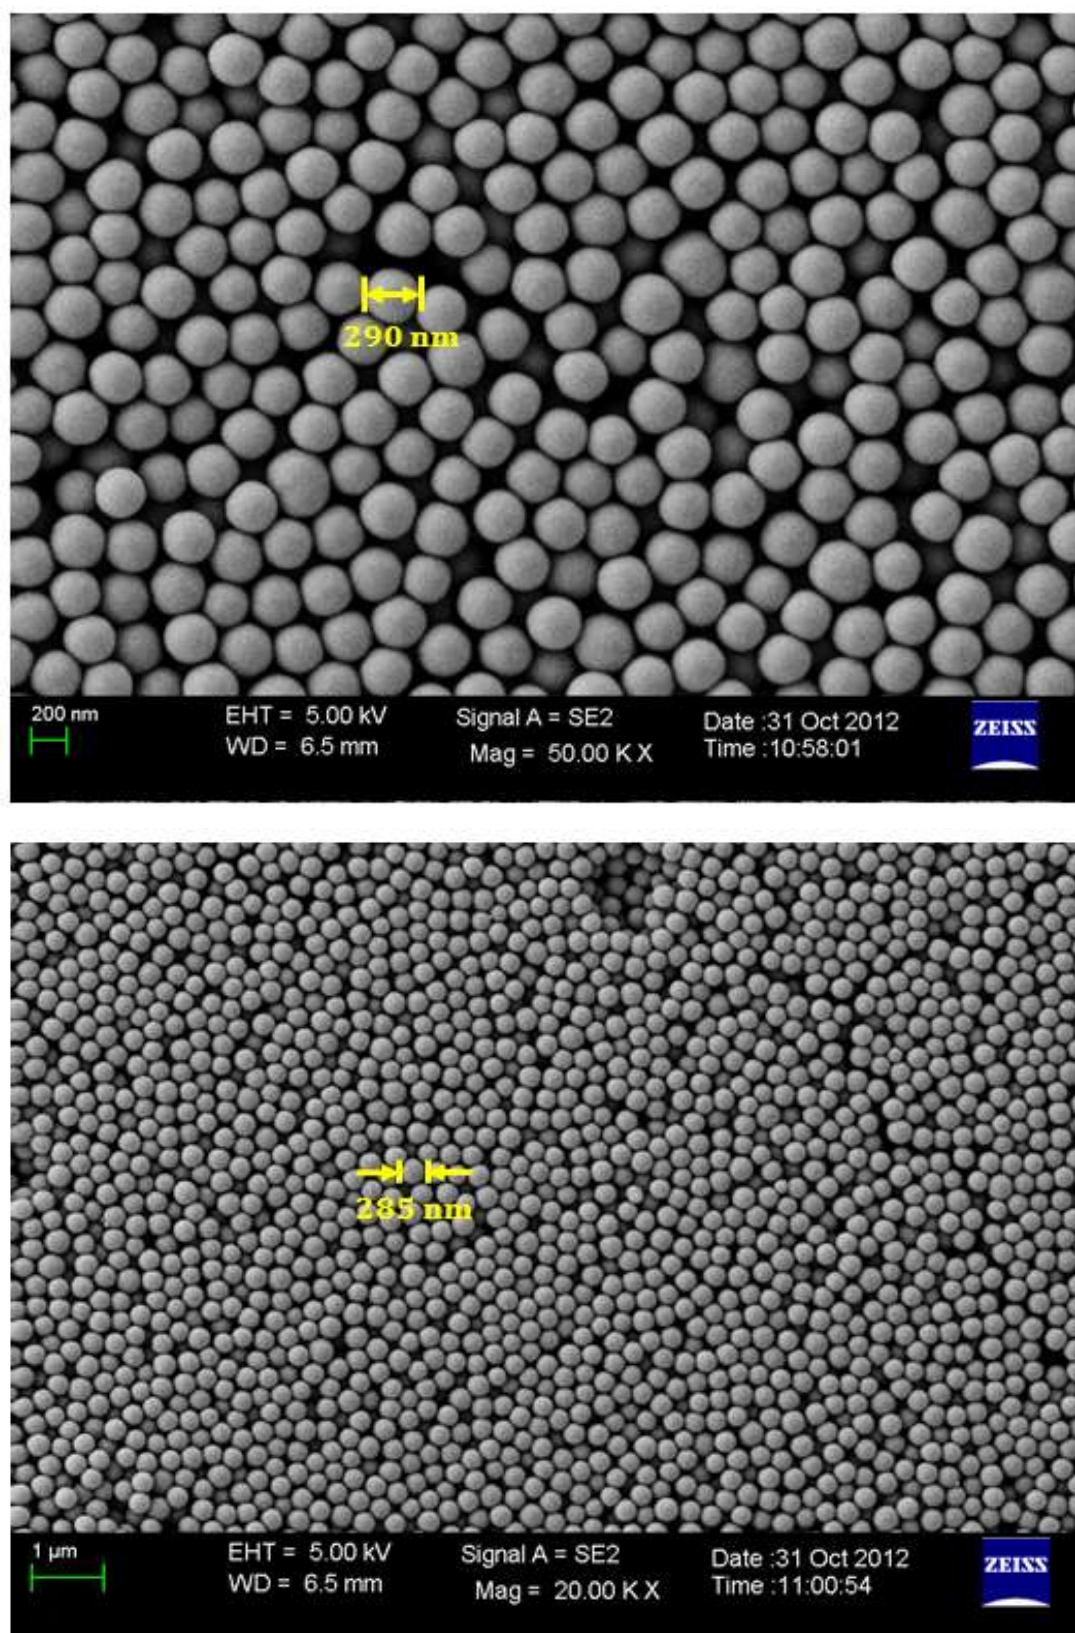

**Figure S3.** SEM images of spherical silica template .

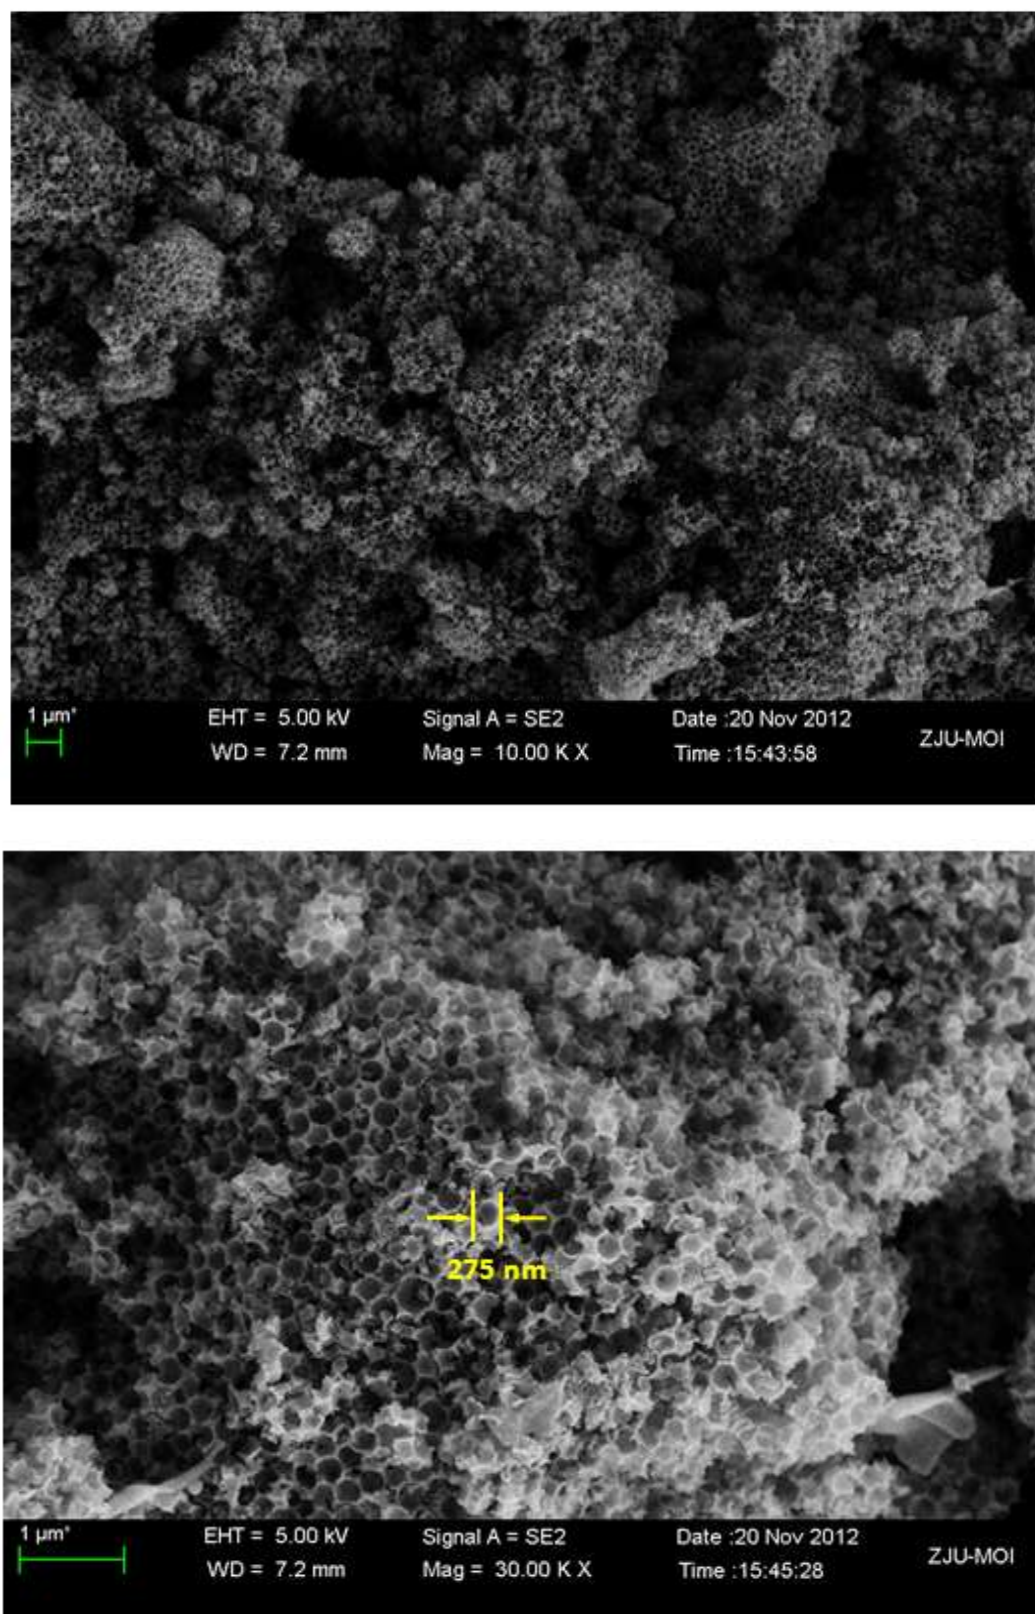

**Figure S4.** SEM images of HCH-dca-900 ( $r=1.0$ ).

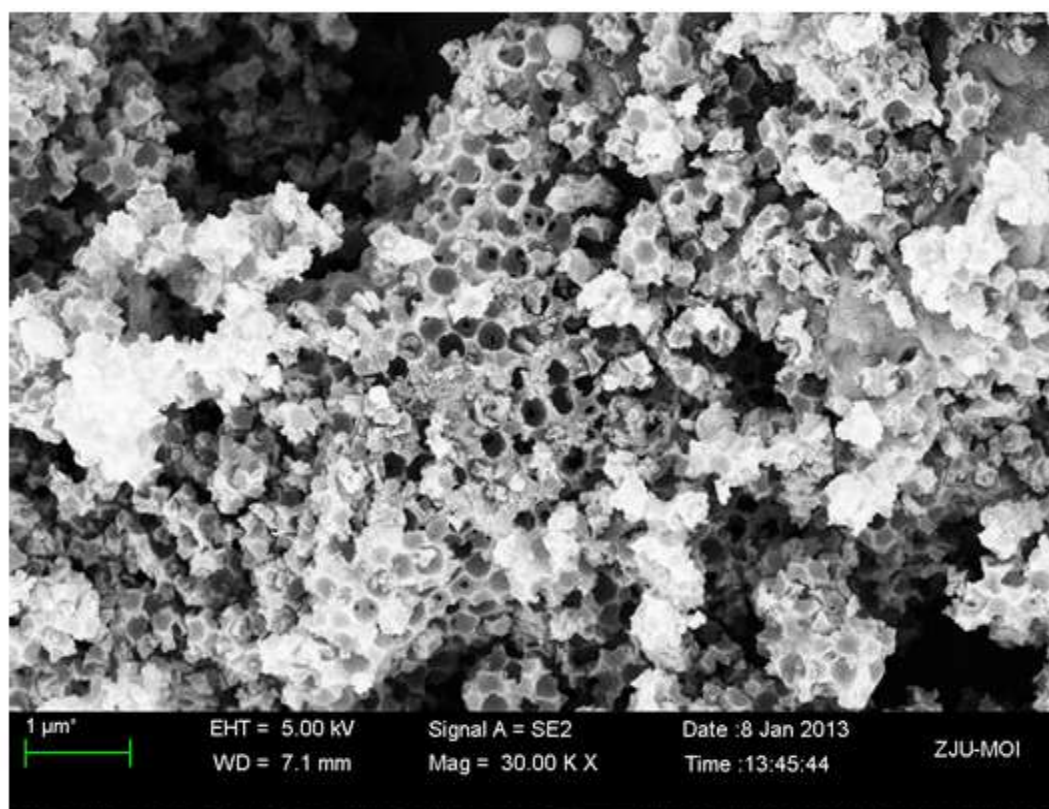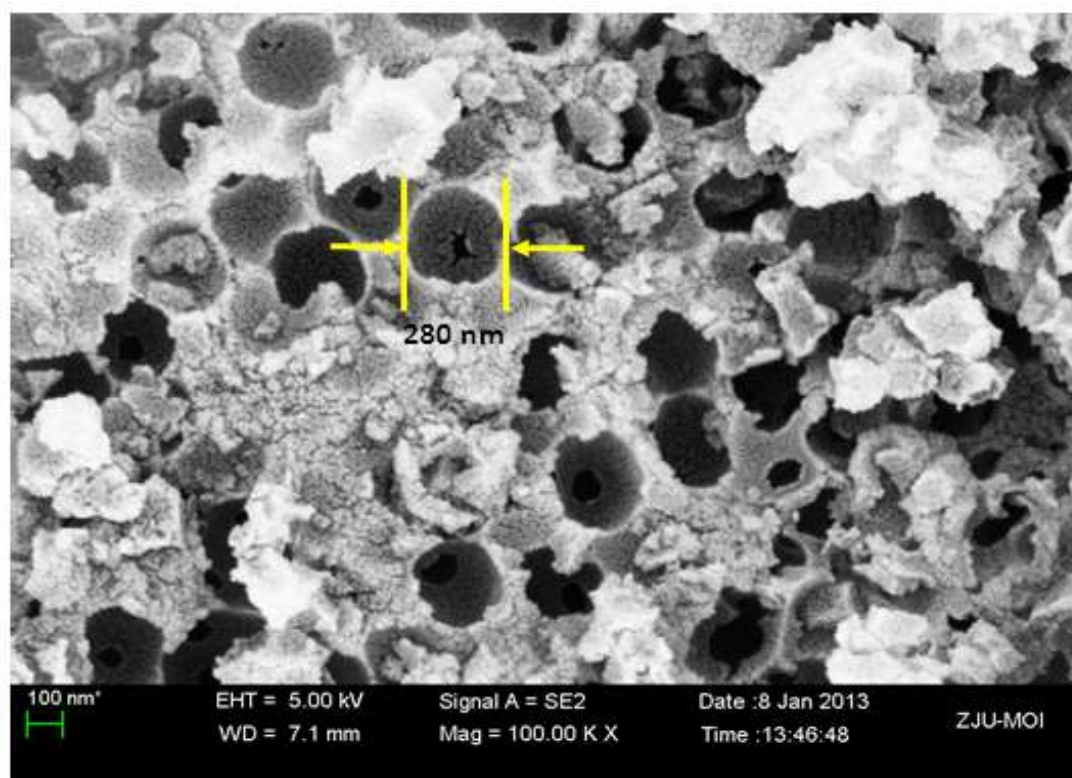

**Figure S5.** SEM images of HCH-dca-900 ( $r=2.0$ ).

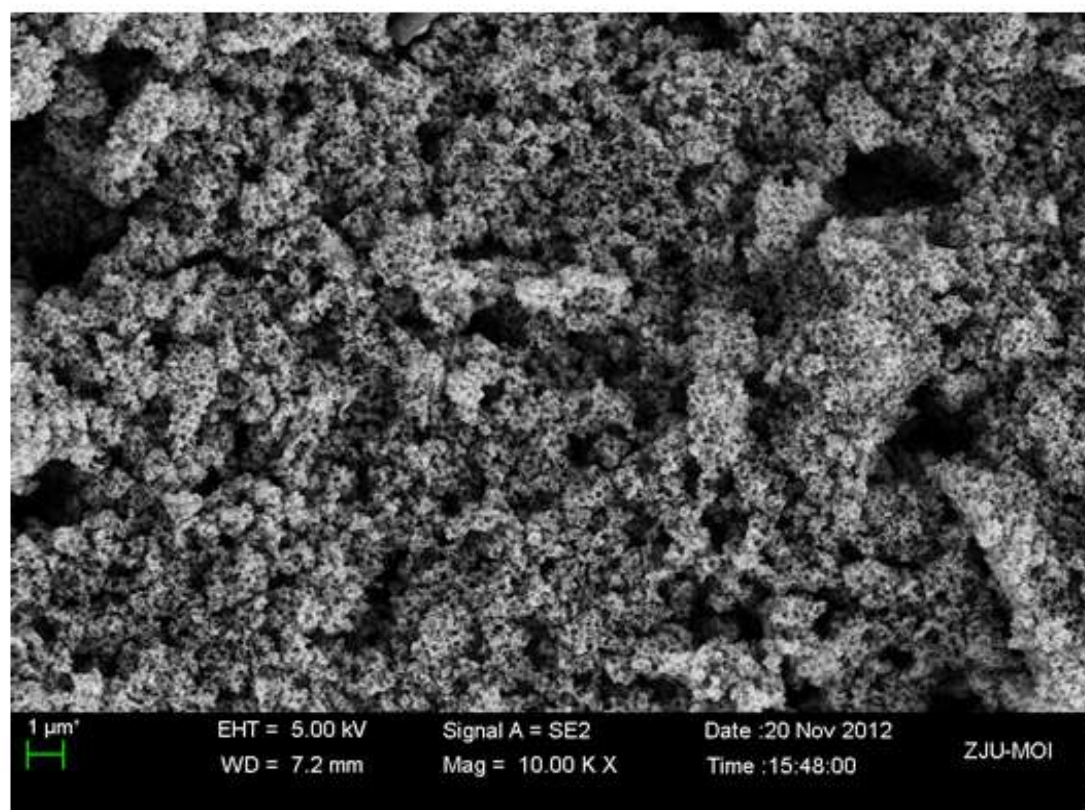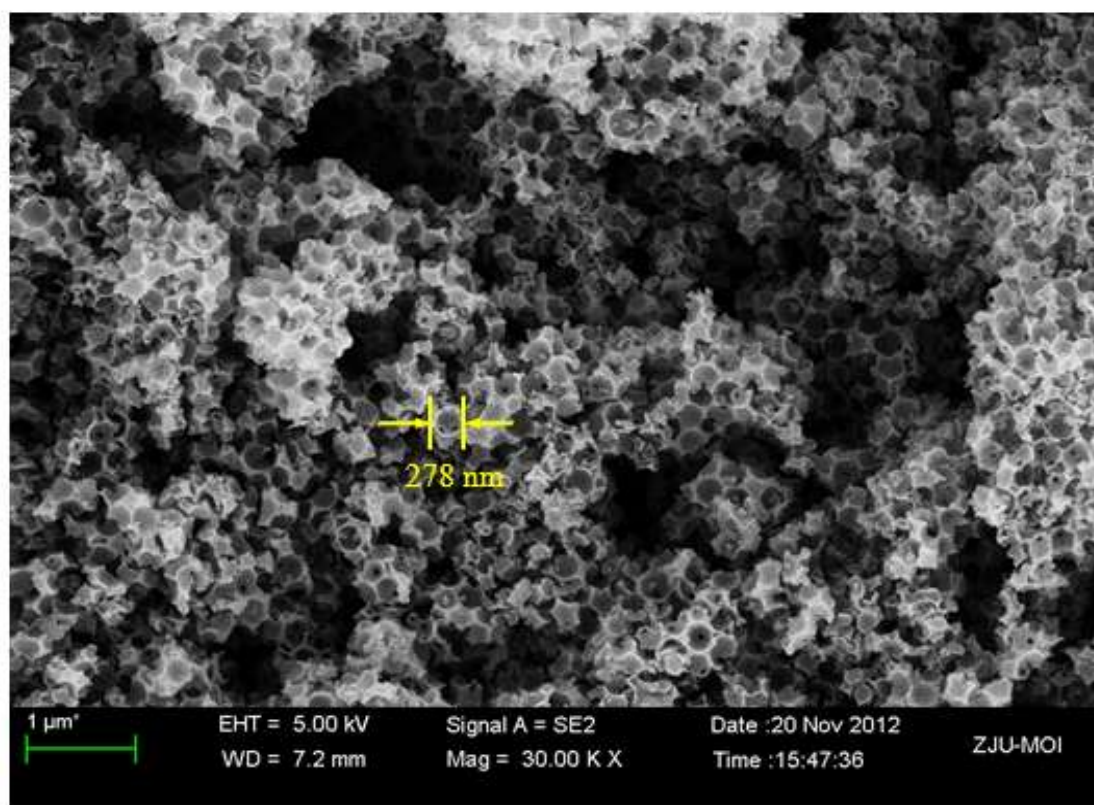

**Figure S6.** SEM images of HCH-dca-600 ( $r=1.0$ ).

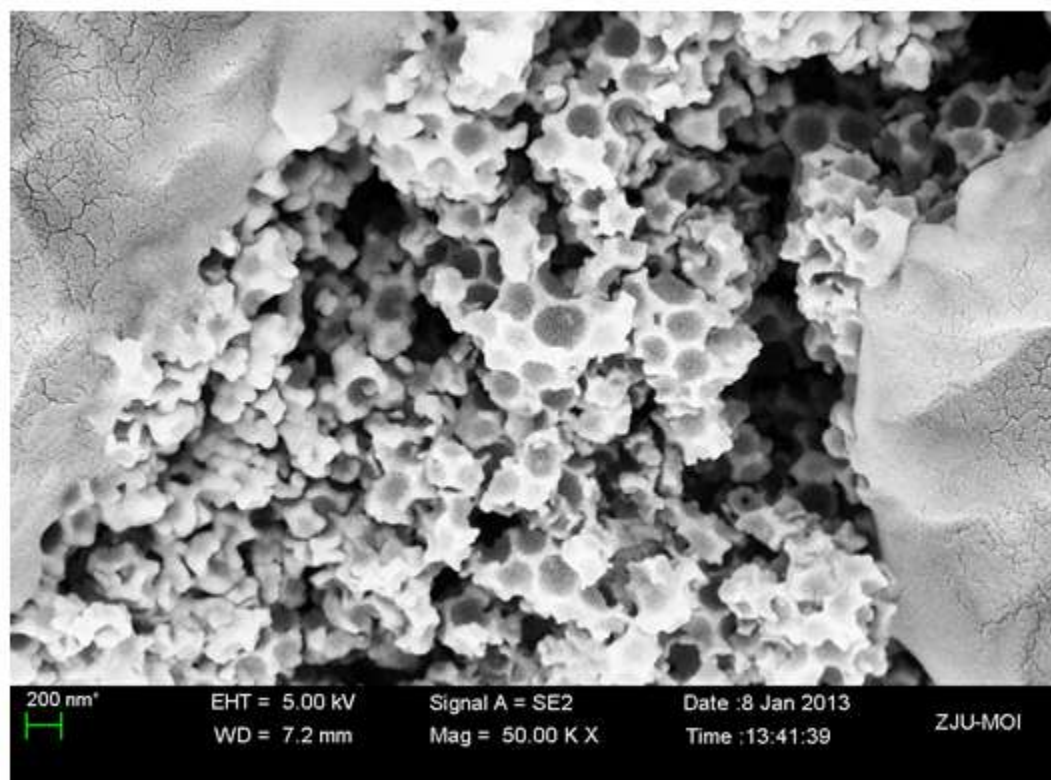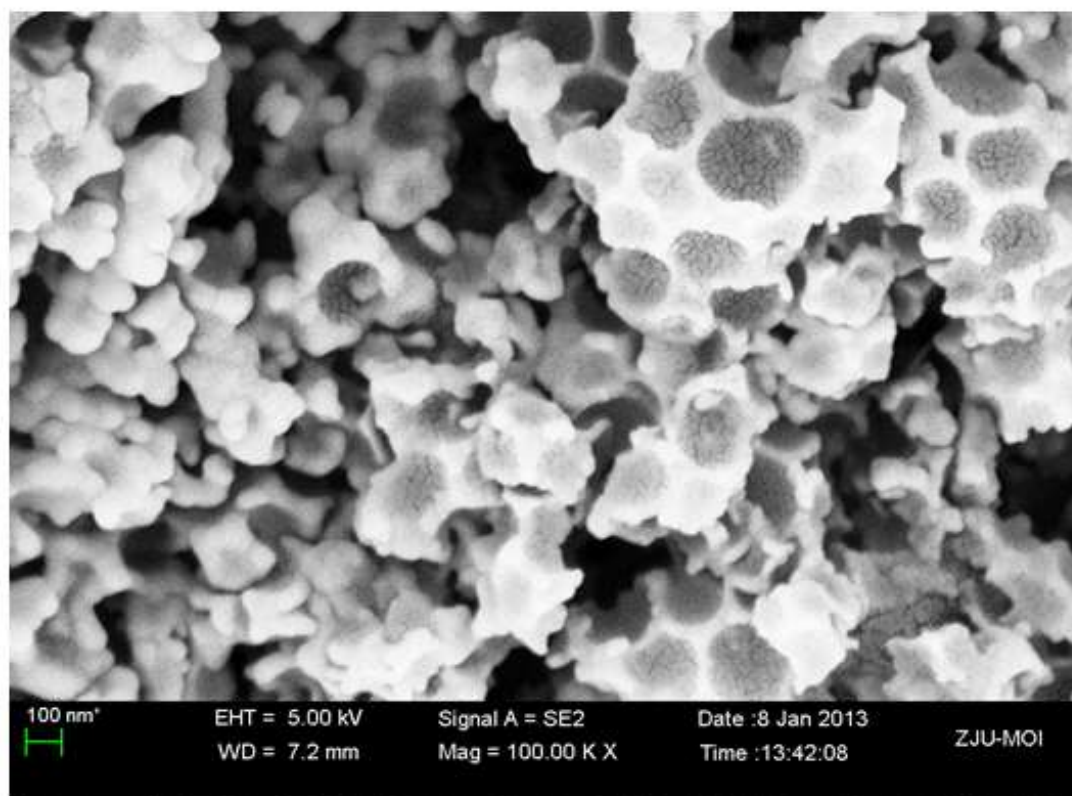

**Figure S7.** SEM images of HCH-dca-1000 ( $r=1.0$ ).

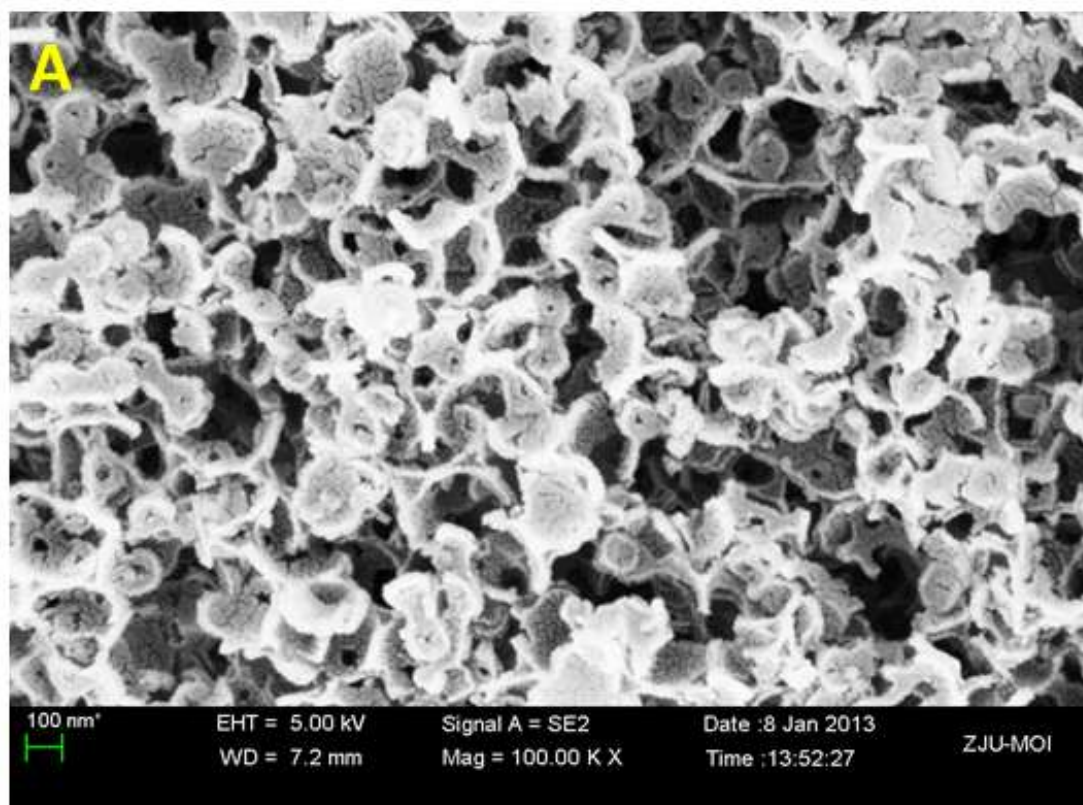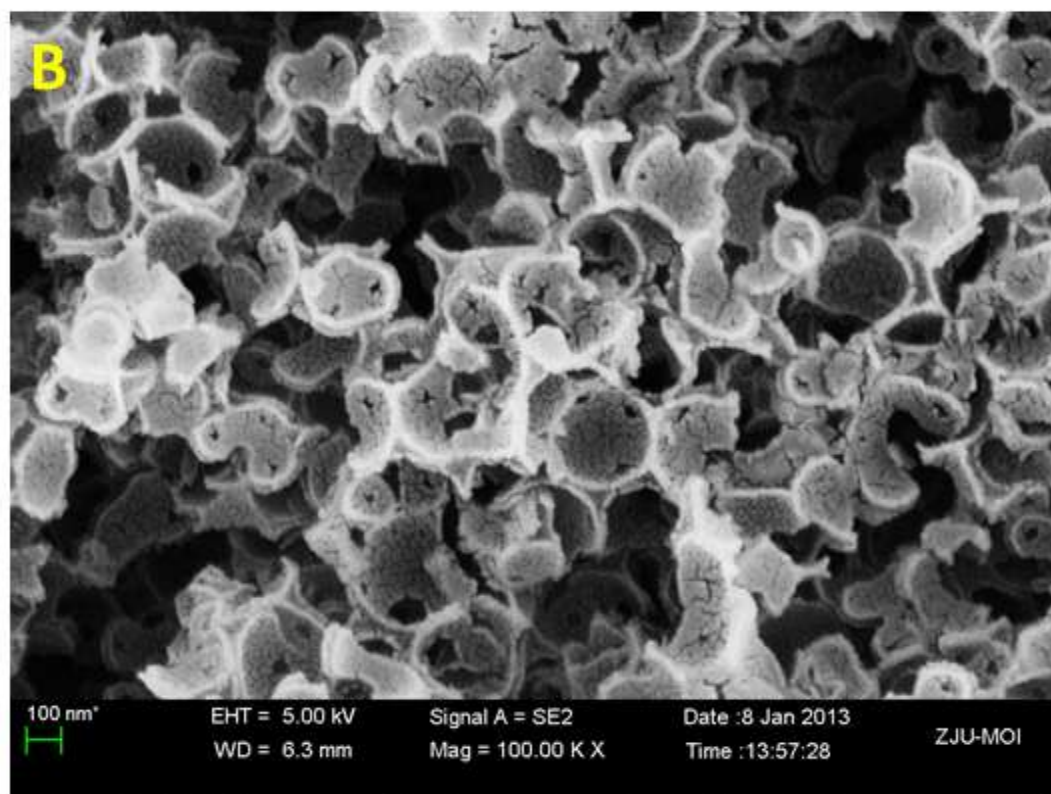

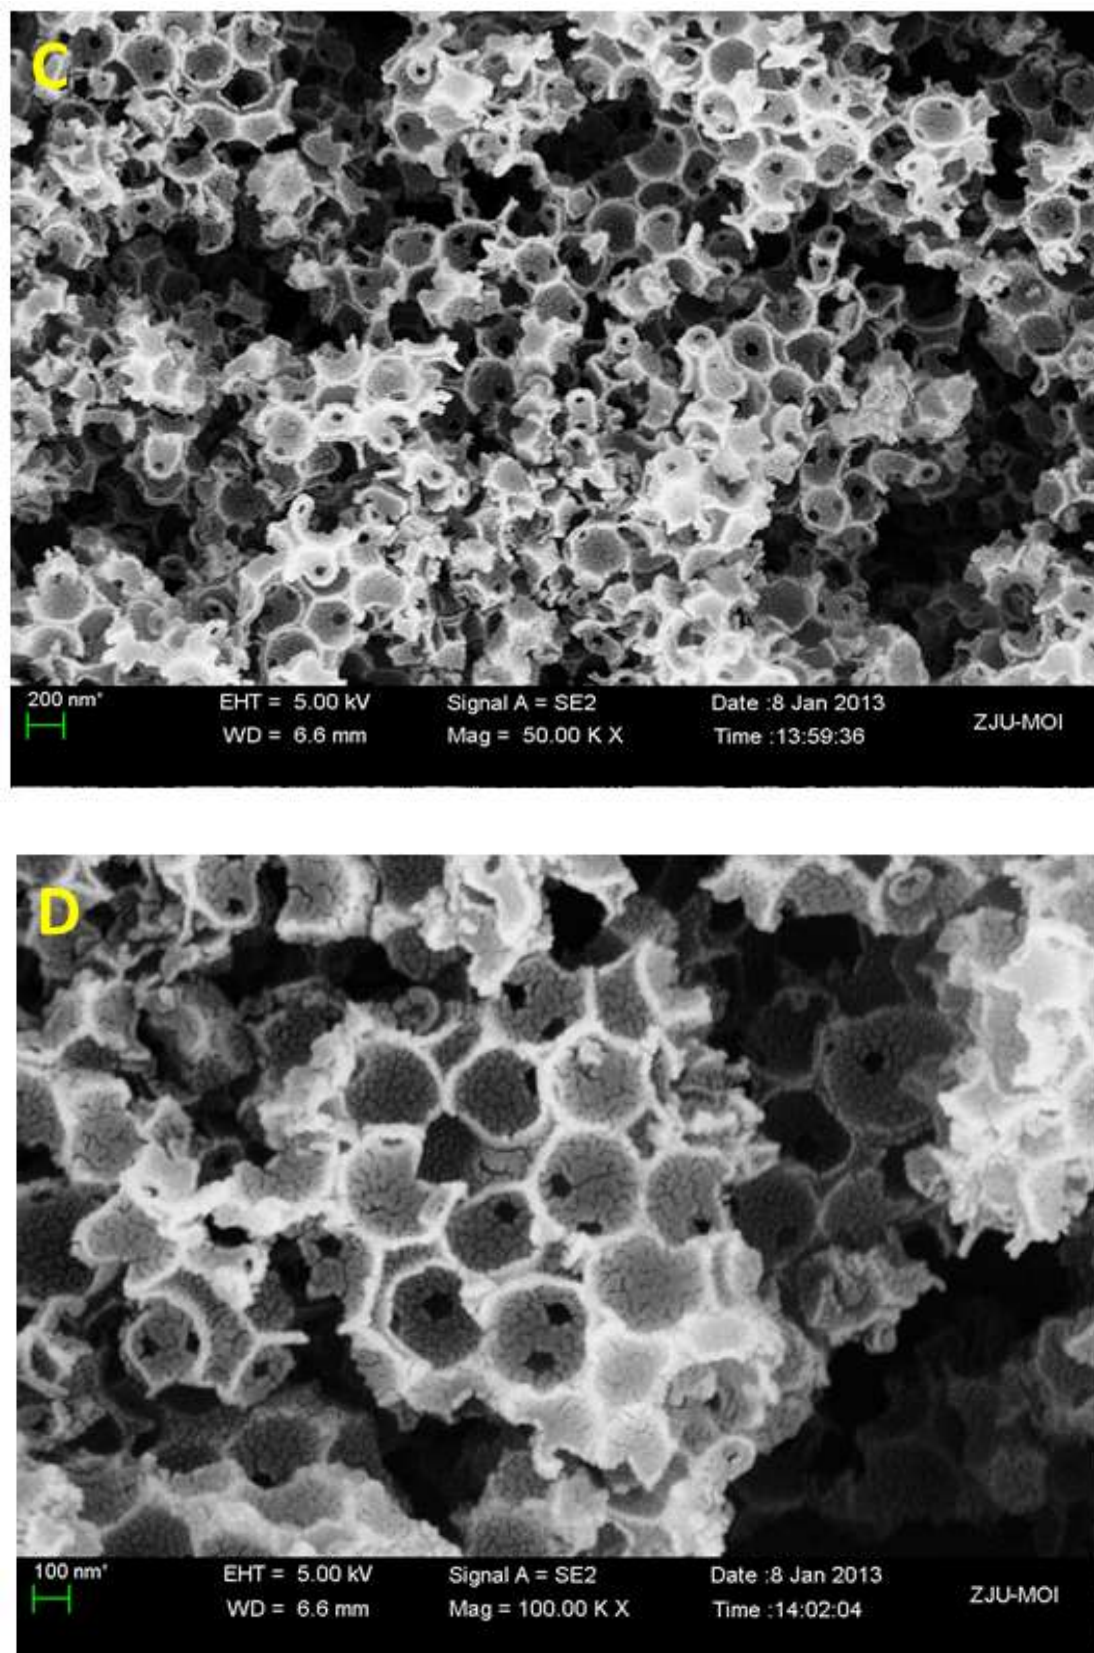

**Figure S8.** SEM images of HCH-Cl-900 (A)  $r=0.5$  (B)  $r=1.0$  (C) and (D)  $r=2.0$ .

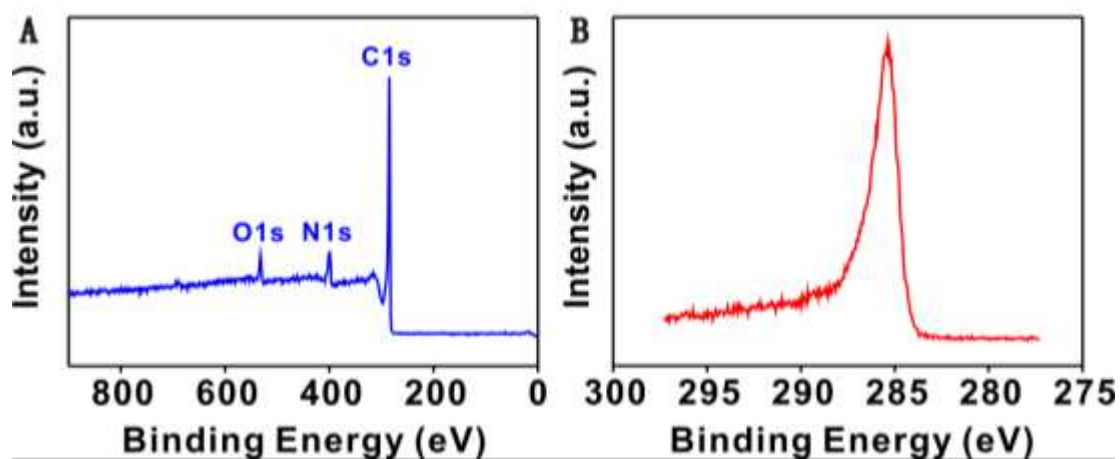

**Figure S9.** XPS spectra of HCH-dca-900 ( $r=1.0$ ): (A) the wide spectra.  
(B) the typical C1s spectra.

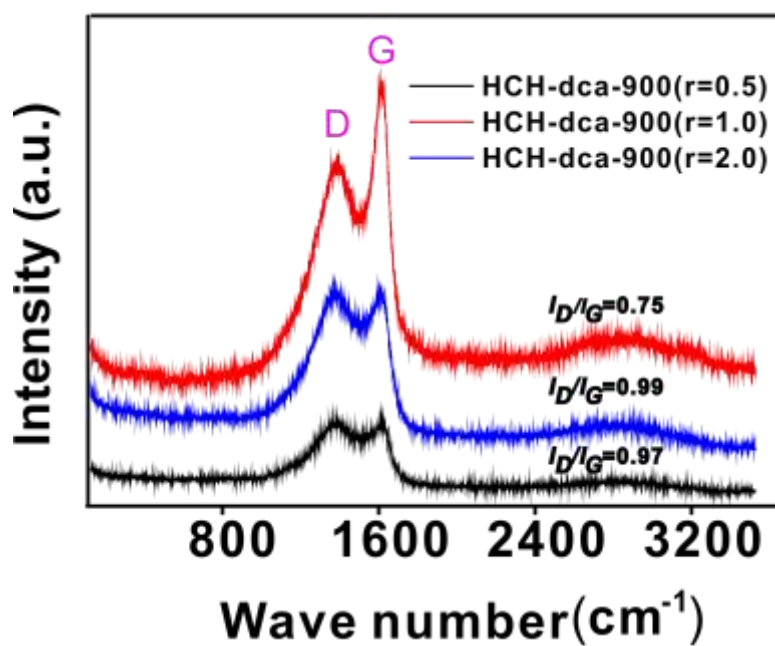

**Figure S10.** Raman spectra of HCH-dca-900 with different  $r$ .

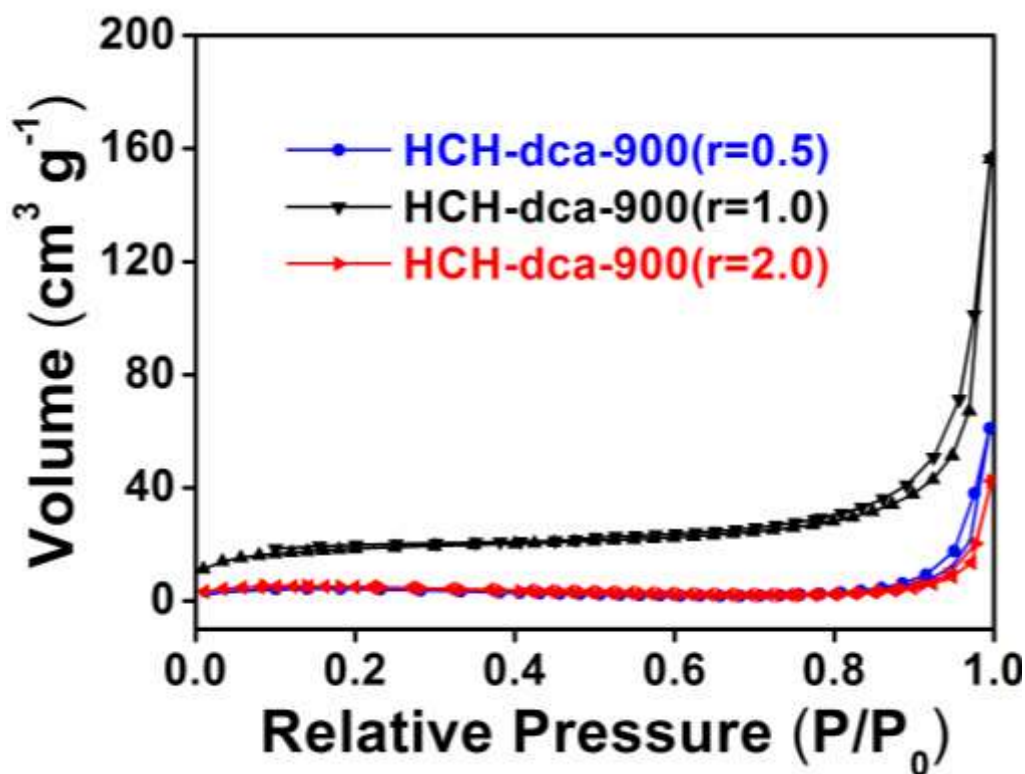

**Figure S11.** Nitrogen adsorption / desorption isotherms of HCH-dca-900.

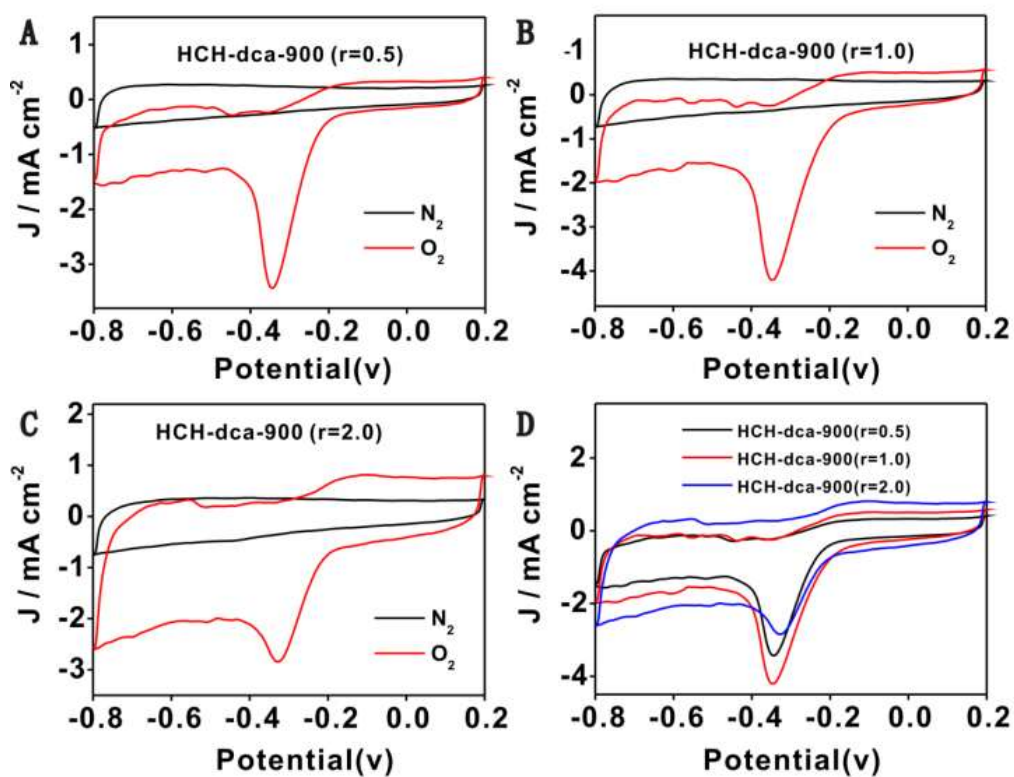

**Figure S12.** The cyclic voltammograms of HCH-dca-900 (A)  $r=0.5$  (B)  $r=1.0$  (C)  $r=2.0$  and (D) compare of HCH-dca-900

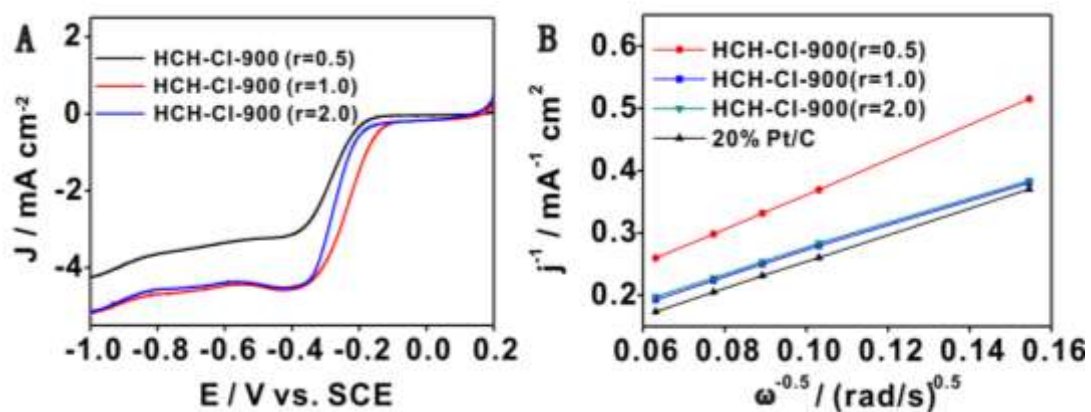

**Figure S13.** (A) Polarization curves on a glassy carbon rotating disk electrode for HCH-Cl-900 in  $\text{O}_2$ -saturated 0.1 M KOH at a scan rate of  $10 \text{ mV s}^{-1}$ . (B) Koutecky-Levich plots of HCH-Cl-900 ( $r=0.5$ , 1.0 and 2.0) and 20 wt% Pt/C at  $-0.60\text{V}$ .

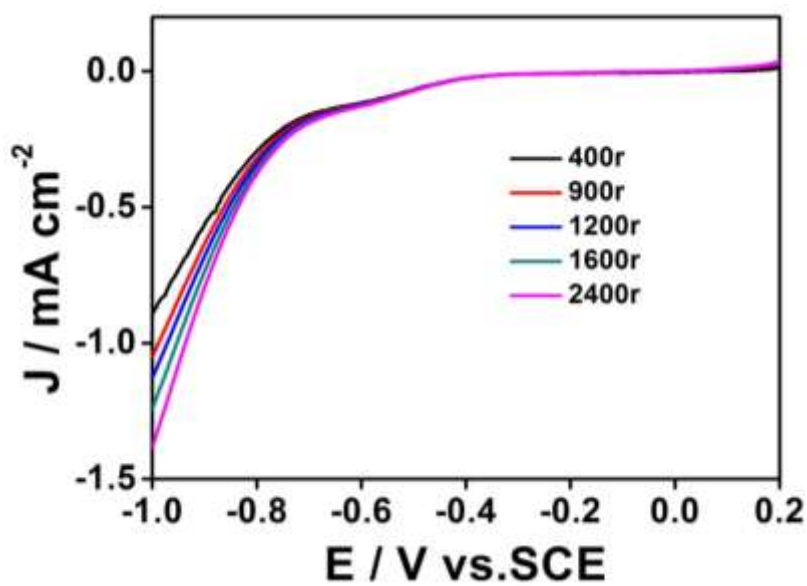

**Figure S14.** LSV curves of ORR of blank experiment on the GC electrode

**Equation S1.** The equation of the shifted electrons n of ORR in alkaline electrolyte.

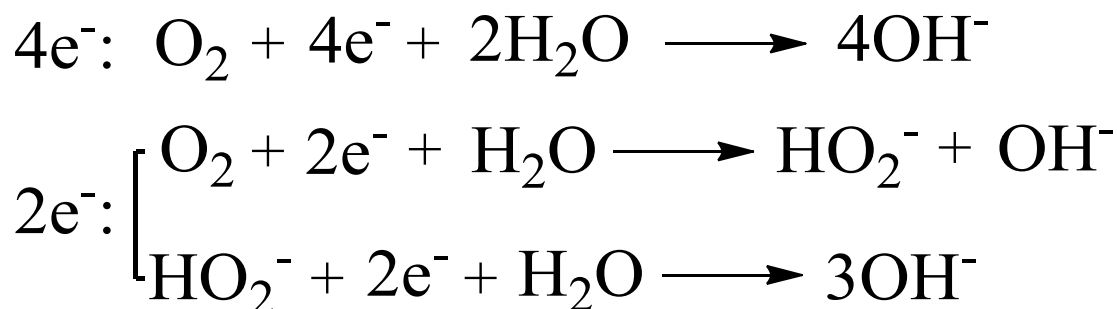

**Equation S2.** The Koutecky-Levich equations.

$$\frac{1}{j} = \frac{1}{j_k} + \frac{1}{B\omega^{0.5}}$$

where  $j_k$  is the kinetic current and B is Levich slope which is given by:

$$B = 0.62 n F (D_{O_2})^{2/3} \nu^{(-1/6)} C_{O_2}$$

Here n is the number of electrons transferred in the reduction of one  $O_2$  molecule, F is the Faraday constant ( $F = 96485 \text{ C/mol}$ ),  $D_{O_2}$  is the diffusion coefficient of  $O_2$  ( $D_{O_2} = 1.9 \times 10^{-5} \text{ cm}^2 \text{ s}^{-1}$ ),  $\nu$  is the kinematics viscosity for KOH ( $\nu = 0.01 \text{ cm}^2 \text{ s}^{-1}$ ) and  $C_{O_2}$  is concentration of  $O_2$  in the solution ( $C_{O_2} = 1.2 \times 10^{-6} \text{ mol cm}^{-3}$ ). The constant 0.62 is adopted when the rotation speed is expressed in rps.

## References

1. X. Xu, Y. Li, Y. Gong, P. Zhang, H. Li and Y. Wang, *J. Am. Chem. Soc.*, 2012, **134**, 16987.
2. Z. Wang, R. Jia, J. Zheng, J. Zhao, L. Li, J. Song and Z. Zhu, *ACS Nano.*, 2011, **5**, 1677.
3. T. Chen, Z. Cai, Z. Yang, L. Li, X. Sun, T. Huang, A. Yu, H. G. Kia and H. Peng, *Adv. Mater.*, 2011, **23**, 4620.
4. S. Shanmugam and T. Osaka, *Chem. Commun.*, 2011, **47**, 4463.
5. W. Yang, T. P. Feller and M. Antonietti, *J. Am. Chem. Soc.*, 2011, **133**, 206.
6. R. Liu, D. Wu, X. Feng and K. Mullen, *Angew. Chem. Int. Ed.*, 2010, **49**, 2565.
